# Supplementary material
Source: PubMed Central journal article supplement (PMC3485415)
Supplement: NIHMS380007-supplement-supplement_1.pdf [file NIHMS380007-supplement-supplement_1.pdf]

**Video S1**

[Click here to download Video Component\(s\) \(each less than 100 MB\): Video01\\_Unburned BE.wmv](#)

**Video S2**

[Click here to download Video Component\(s\) \(each less than 100 MB\): Video02\\_Residual glands\\_Captions.wmv](#)

**Video S3**

[Click here to download Video Component\(s\) \(each less than 100 MB\): Video03\\_Effective Treatment\\_Captions.wmv](#)
